# Supplementary material for: NG-Circos: next-generation Circos for data visualization and interpretation
Source: PubMed Central journal article supplement — NAR Genom Bioinform. 2020 Sep 3;2(3):lqaa069. doi: 10.1093/nargab/lqaa069 (PMC7671351; doi:10.1093/nargab/lqaa069), 2020-09-03
Supplement: lqaa069_supplemental_file.pdf [file lqaa069_supplemental_file.pdf]

**SUPPLEMENTARY INFORMATION**

**Supplementary Table 1.** Function modules in NG-Circos.

| Module                | In BioCircos.js | Function                     | Demo                                                                                                                                                                                                                                                                                                                                                                                                                             |
|-----------------------|-----------------|------------------------------|----------------------------------------------------------------------------------------------------------------------------------------------------------------------------------------------------------------------------------------------------------------------------------------------------------------------------------------------------------------------------------------------------------------------------------|
| <b>WIG</b>            | No              | Designed for WIG data format | 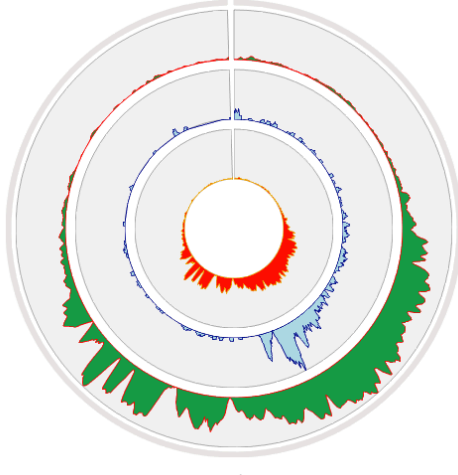 <p>A circular WIG plot for chromosome 8p. The plot consists of three concentric rings. The outermost ring is green, the middle ring is blue, and the innermost ring is red. The signal intensity is represented by the height of the bars in each ring, showing peaks and valleys across the chromosome. The label '8p' is at the bottom.</p> |
| <b>GENE</b>           | No              | Designed for GTF data format |  <p>A circular gene model for chromosome 8p. The plot shows a circular track with blue rectangular blocks representing exons and lines with arrows representing introns and the direction of transcription. The label '8p' is at the bottom.</p>                                                                                              |
| <b>LOLLIPOP<br/>P</b> | No              | Draws Lollipop plot          |  <p>A circular Lollipop plot for the EGFR gene. The plot shows a circular track with yellow dots representing mutations and lines representing the distance from the gene to the mutation. The label 'EGFR' is at the bottom.</p>                                                                                                            |

|                        |           |                                                      |                                                                                                                                                        |
|------------------------|-----------|------------------------------------------------------|--------------------------------------------------------------------------------------------------------------------------------------------------------|
| <p><b>CHORD</b></p>    | <p>No</p> | <p>Draws chord plot</p>                              | 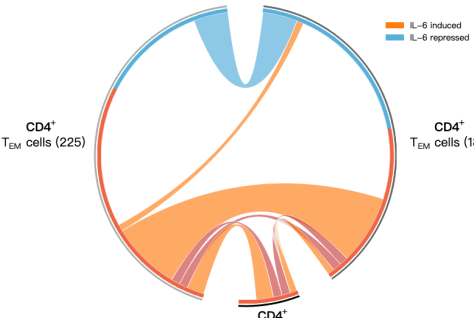                                                                     |
| <p><b>BUBBLE</b></p>   | <p>No</p> | <p>Draws bubble plot</p>                             |                                                                      |
| <p><b>REDIRECT</b></p> | <p>No</p> | <p>Adds redirection function to graphic elements</p> |                                                                     |
| <p><b>DOWNLOAD</b></p> | <p>No</p> | <p>Downloads PNG and SVG images</p>                  | <p>Download png  Download svg </p> <p>Click and download here</p>  |

|                              |           |                                                                                                                          |                                                                                                                                                        |
|------------------------------|-----------|--------------------------------------------------------------------------------------------------------------------------|--------------------------------------------------------------------------------------------------------------------------------------------------------|
| <p><b>AUXILIARY LINE</b></p> | <p>No</p> | <p>Adds auxiliary lines (curve, straight, broken, dash, solid line) and markers (circle, square, arrow, stub marker)</p> | 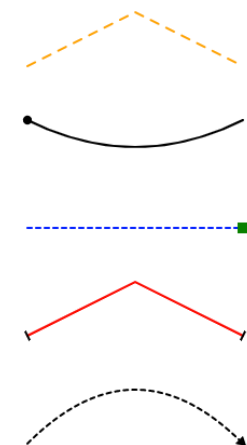                                                                    |
| <p><b>LEGEND</b></p>         | <p>No</p> | <p>Adds figure legends</p>                                                                                               |                                                                    |
| <p><b>COMPARE</b></p>        | <p>No</p> | <p>Compares other modules in two conditions</p>                                                                          |  <p>Functional PVT1 promoter      Non-functional PVT1 promoter</p> |
| <p><b>COMBINATION</b></p>    | <p>No</p> | <p>Combines other modules</p>                                                                                            |                                                                    |

|                       |            |                           |                                                                                      |
|-----------------------|------------|---------------------------|--------------------------------------------------------------------------------------|
| <p><b>HEATMAP</b></p> | <p>Yes</p> | <p>Draws heatmap</p>      | 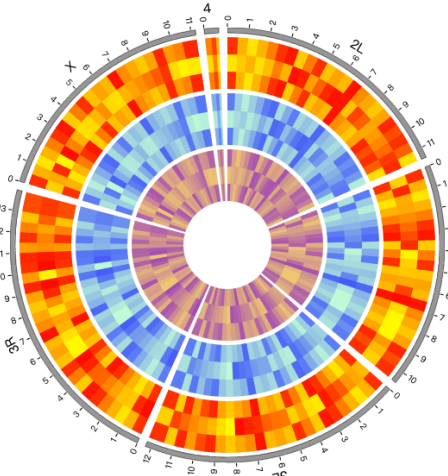   |
| <p><b>LINE</b></p>    | <p>Yes</p> | <p>Draws line plot</p>    |   |
| <p><b>SCATTER</b></p> | <p>Yes</p> | <p>Draws scatter plot</p> |  |

|                         |            |                          |                                                                                      |
|-------------------------|------------|--------------------------|--------------------------------------------------------------------------------------|
| <p><b>HISTOGRAM</b></p> | <p>Yes</p> | <p>Draws histogram</p>   | 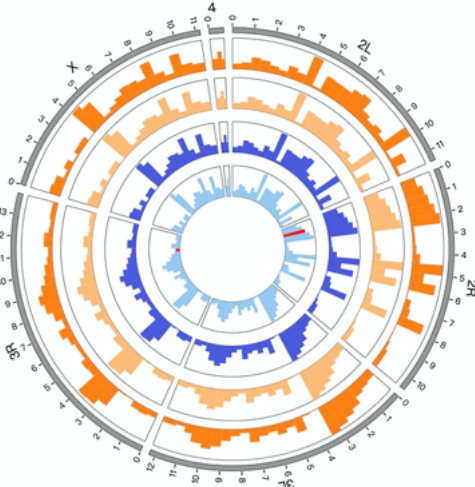   |
| <p><b>CNV</b></p>       | <p>Yes</p> | <p>Displays CNV data</p> |   |
| <p><b>SNP</b></p>       | <p>Yes</p> | <p>Displays SNP data</p> |  |

|                    |            |                             |                                                                                      |
|--------------------|------------|-----------------------------|--------------------------------------------------------------------------------------|
| <p><b>ARC</b></p>  | <p>Yes</p> | <p>Draws arcs</p>           |    |
| <p><b>LINK</b></p> | <p>Yes</p> | <p>Draws links</p>          |   |
| <p><b>TEXT</b></p> | <p>Yes</p> | <p>Adds annotation text</p> |  |

|                               |            |                                                               |                                                                                                                                                                                                                                                                                                                                                                                                                                                               |
|-------------------------------|------------|---------------------------------------------------------------|---------------------------------------------------------------------------------------------------------------------------------------------------------------------------------------------------------------------------------------------------------------------------------------------------------------------------------------------------------------------------------------------------------------------------------------------------------------|
| <p><b>BACKGR<br/>OUND</b></p> | <p>Yes</p> | <p>Adds background and axis<br/>circles for other modules</p> | 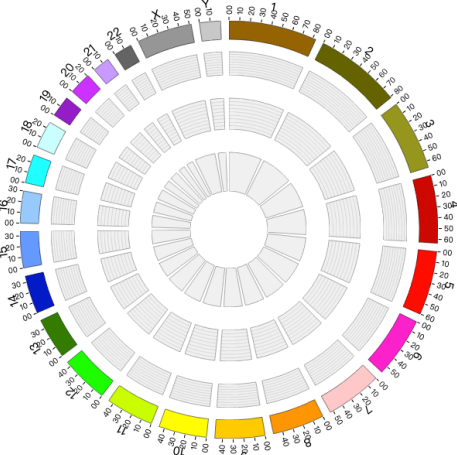 <p>The diagram is a circular chart with several concentric rings. The outermost ring is color-coded and contains numerical labels. The colors transition through a spectrum: purple, blue, green, yellow, orange, red, pink, and magenta. The inner rings are grey and appear to be a grid or a series of segments. The overall structure is circular and symmetrical.</p> |
|-------------------------------|------------|---------------------------------------------------------------|---------------------------------------------------------------------------------------------------------------------------------------------------------------------------------------------------------------------------------------------------------------------------------------------------------------------------------------------------------------------------------------------------------------------------------------------------------------|

**Supplementary Table 2.** Mouse events and corresponding trigger conditions in NG-Circos.

| <b>Mouse event</b> | <b>Trigger conditions</b>                                              |
|--------------------|------------------------------------------------------------------------|
| MouseClicked       | Click on the graphic element.                                          |
| MouseDown          | Depress the mouse button on the graphic element.                       |
| MouseUp            | Release the mouse button on the graphic element.                       |
| MouseEnter         | Move mouse into the graphic element.                                   |
| MouseLeave         | Move mouse out the graphic element.                                    |
| MouseMove          | Move mouse over the graphic element.                                   |
| MouseOut           | Move mouse out of the selected graphic element and its child elements. |
| MouseOver          | Move mouse into the graphic element and its child elements.            |
| Zoom               | (1) Zoom in and out using the mouse wheel; (2) double click.           |
| Drag               | Depress the mouse button on the graphic element and drag.              |
